# Supplementary material for: The Infection, Coinfection, and Abundance of Intestinal Protozoa Increase the Serum Levels of IFABP2 and TNF-α in Patients With Rheumatoid Arthritis
Source: PubMed Central journal article supplement (PMC9039364; doi:10.3389/fmed.2022.846934), 2022-04-12
Supplement: Data_Sheet_1.pdf [file Data_Sheet_1.pdf]

## Supplementary Material

Supplementary Table 1. General characteristics according to individual positive RA patients

| Variables                     | Case 1                  | Case 2                  | Case 3                  | Case 4                                                                        | Case 5                  | Case 6                  | Case 7                                             | Case 8                                             | Case 9                                                                                                                 |
|-------------------------------|-------------------------|-------------------------|-------------------------|-------------------------------------------------------------------------------|-------------------------|-------------------------|----------------------------------------------------|----------------------------------------------------|------------------------------------------------------------------------------------------------------------------------|
| <b>Sociodemographic data</b>  |                         |                         |                         |                                                                               |                         |                         |                                                    |                                                    |                                                                                                                        |
| Age                           | 47                      | 33                      | 51                      | 53                                                                            | 23                      | 53                      | 46                                                 | 43                                                 | 27                                                                                                                     |
| Locality                      | Rural                   | Urban                   | Rural                   | Rural                                                                         | Rural                   | Rural                   | Rural                                              | Urban                                              | Rural                                                                                                                  |
| <b>Current therapy scheme</b> | Newly diagnosed         | Newly diagnosed         | Newly diagnosed         | Newly diagnosed                                                               | MTX                     | MTX                     | MTX+PDN                                            | MTX                                                | MTX+CLQ+SSZ+PDN                                                                                                        |
| <b>Stool analysis</b>         |                         |                         |                         |                                                                               |                         |                         |                                                    |                                                    |                                                                                                                        |
| pH (units)                    | 8                       | 5                       | 5                       | 7                                                                             | 7                       | 6                       | 7                                                  | 6                                                  | 7                                                                                                                      |
| Neutral fats                  | Scarce                  | Scarce                  | Scarce                  | Scarce                                                                        | Scarce                  | Moderate                | Scarce                                             | Moderate                                           | Absent                                                                                                                 |
| Mucus                         | Absent                  | Scarce                  | Scarce                  | Absent                                                                        | Absent                  | Absent                  | Absent                                             | Absent                                             | Absent                                                                                                                 |
| Food undigested               | Scarce                  | Moderate                | Scarce                  | Increase                                                                      | Scarce                  | Moderate                | Scarce                                             | Scarce                                             | Scarce                                                                                                                 |
| Starches                      | Scarce                  | Scarce                  | Absent                  | Moderate                                                                      | Scarce                  | Scarce                  | Scarce                                             | Moderate                                           | Moderate                                                                                                               |
| Vegetable fibers undigested   | Scarce                  | Absent                  | Scarce                  | Scarce                                                                        | Scarce                  | Scarce                  | Absent                                             | Moderate                                           | Scarce                                                                                                                 |
| Fatty acids crystals          | Increase                | Scarce                  | Scarce                  | Increase                                                                      | Increase                | Increase                | Increase                                           | Increase                                           | Increase                                                                                                               |
| Charcot Leyden crystals       | Absent                  | Absent                  | Absent                  | Absent                                                                        | Absent                  | Absent                  | Absent                                             | Absent                                             | Scarce                                                                                                                 |
| Protozoa Infection            | <i>Blastocystis sp.</i> | <i>Blastocystis sp.</i> | <i>Blastocystis sp.</i> | <i>Blastocystis sp.</i> ;<br><i>Endolimax nana</i> ;<br><i>Entamoeba coli</i> | <i>Blastocystis sp.</i> | <i>Blastocystis sp.</i> | <i>Blastocystis sp.</i> ;<br><i>Endolimax nana</i> | <i>Blastocystis sp.</i> ;<br><i>Endolimax nana</i> | <i>Blastocystis sp.</i> ;<br><i>Endolimax nana</i> ;<br><i>Entamoeba coli</i> ;<br><i>Entamoeba histolytica/dispar</i> |
| Parasite abundance            | Scarce                  | Scarce                  | Moderate                | Abundant;<br>abundant;<br>scarce                                              | Scarce                  | Moderate                | Scarce; scarce                                     | Abundant;<br>moderate                              | Abundant; abundant;<br>scarce; scarce                                                                                  |
| Status Infection              | Single                  | Single                  | Single                  | Co-infection                                                                  | Single                  | Single                  | Co-infection                                       | Co-infection                                       | Co-infection                                                                                                           |

*CLQ*, chloroquine; *MTX*, methotrexate; *PDN*, prednisone; *RA*, rheumatoid arthritis; *SSZ*, sulphasalazine.

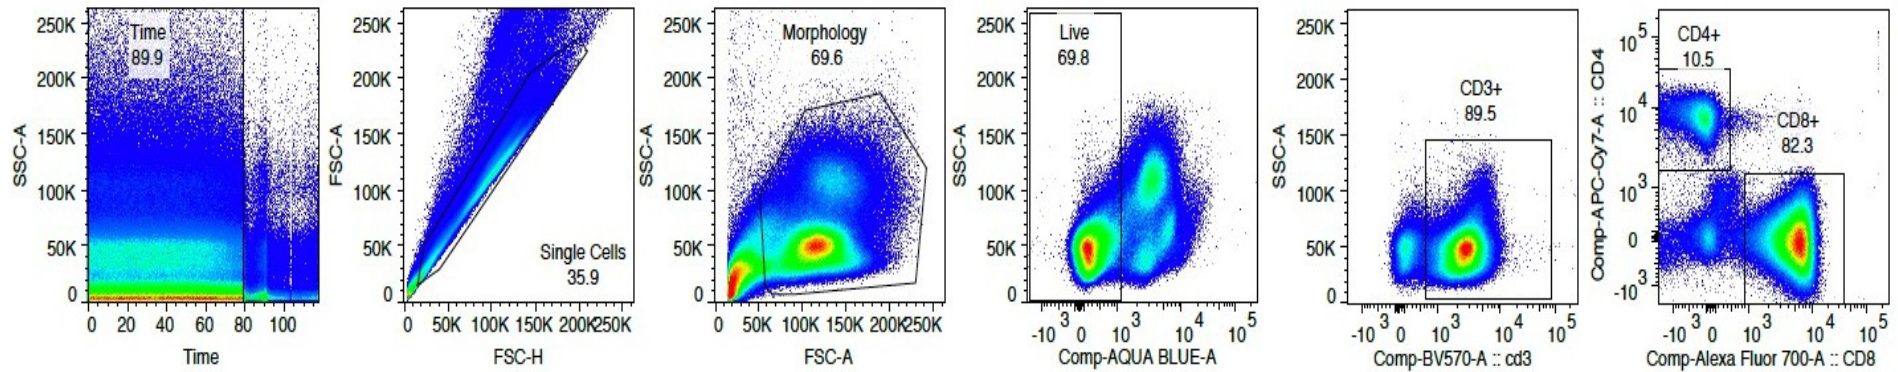

**Supplementary Figure 1 | Gating strategy for cytometry assay for CD4+ and CD8+ T cells.** The figure shows the gating strategy for the analysis of CD3 and CD4+ T cells and all samples. First define singles and morphology by using forward versus side scatter, followed by the exclusion of dead cells (aqua dye negative events). Live cells were gated on CD3+ and CD4+ or CD8+ T cells.

A)

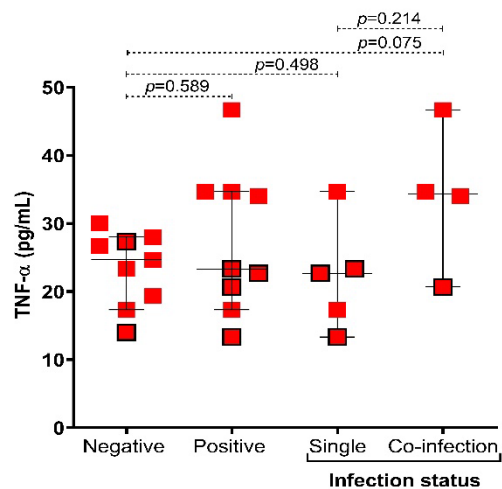

B)

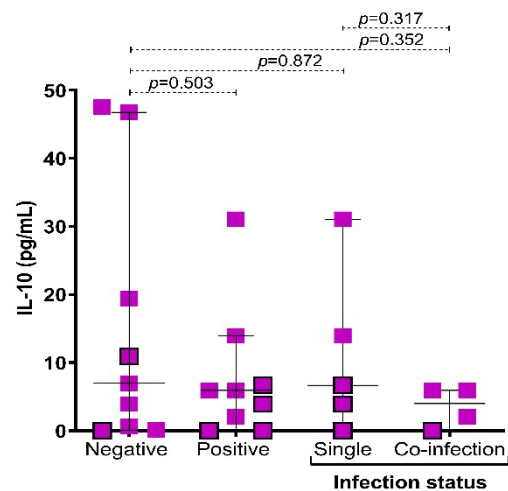

B)

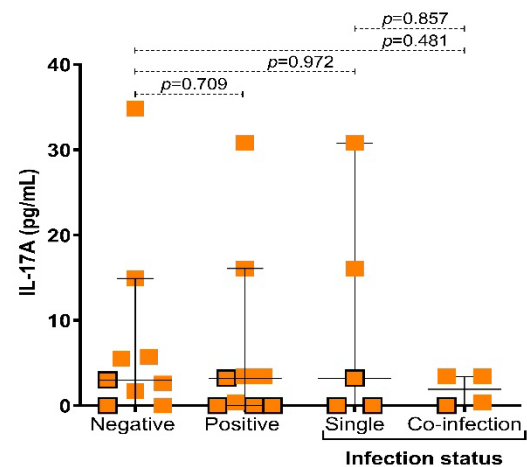

**Supplementary Figure 2 | Association between cytokines levels according to status infection by intestinal protozoa.** A) TNF- $\alpha$  serum levels; B) IL-10 serum levels; C) IL-17A serum levels. Bars represent the median with the P<sub>5</sub>-P<sub>95</sub> range. The boxes with borders represent patients without pharmacological therapy. Statistical analyses were performed by Mann-Whitney U test. Significance was set at p-value <0.05.
